# Supplementary material for: Mapping Cell Membrane Fluctuations Reveals Their Active Regulation and Transient Heterogeneities
Source: PubMed Central journal article supplement — Biophys J. 2017 Oct 17;113(8):1768–81. doi: 10.1016/j.bpj.2017.08.041 (PMC5647594; doi:10.1016/j.bpj.2017.08.041), 2017-10-17
Supplement: mmc1.pdf [file mmc1.pdf]

**Biophysical Journal, Volume 113**

**Supplemental Information**

**Mapping Cell Membrane Fluctuations Reveals Their Active Regulation  
and Transient Heterogeneities**

**Arikta Biswas, Amal Alex, and Bidisha Sinha**

## Supplemental Information

Mapping Cell Membrane Fluctuations Reveals Their Active Regulation and Transient Heterogeneities.

Arikta Biswas, Amal Alex<sup>#</sup> and Bidisha Sinha<sup>\*</sup>

Dept. of Biological Sciences, Indian Institute of Science Education and Research (IISER)  
Kolkata, Mohanpur - 741246, West Bengal, India

<sup>#</sup> Present address: Dept. of Mechanistic Cell Biology, Max Planck Institute of Molecular  
Physiology, 44227 Dortmund, North Rhine-Westphalia, Germany

<sup>\*</sup> Corresponding author (email- bidisha.sinha@iiserkol.ac.in)

## Table of Contents

|                            |    |
|----------------------------|----|
| Supporting Discussion..... | 3  |
| Table S1.....              | 10 |
| Figure S1.....             | 11 |
| Figure S2.....             | 12 |
| Figure S3.....             | 13 |
| Figure S4.....             | 15 |
| Table S2.....              | 16 |
| Figure S5.....             | 17 |
| Figure S6.....             | 18 |
| Figure S7.....             | 19 |
| Figure S8.....             | 20 |
| Figure S9.....             | 21 |
| Figure S10.....            | 22 |

|                 |                                   |
|-----------------|-----------------------------------|
| Figure S11..... | 23                                |
| Figure S12..... | 24                                |
| Figure S13..... | 25                                |
| Figure S14..... | 27                                |
| Figure S15..... | 28                                |
| References..... | 30                                |
| Table S3.....   | provided as a separate Excel file |
| Table S4.....   | provided as a separate Excel file |

## Supporting Discussion

### 1. Method of calibration with beads

- a. Adherent polystyrene beads (60  $\mu\text{m}$  in diameter) are imaged in the IRM mode at EM 30 and varying exposure times.
- b. Linear ROIs are drawn on the bead radially outward from the centre using ImageJ and the intensities along the lines are plotted (Fig. 1 b, *top*). Intensity vs. height plots (Fig. 1 b, *bottom*) are also plotted by converting from radial distance ( $x$ ) to height ( $h$ ) by

$$h - h_0 = R - \sqrt{R^2 - x^2} \quad \text{Eq. (1)}$$

where,  $R$  is the radius of the bead used and  $h_0$  is the minimum separation distance (unknown) between the bead and the substrate.

- c. From the first branch of the intensity–height profile (Fig. 1 b, *bottom*), the maximum and minimum intensity of the first branch ( $I_{\text{max}}$ ,  $I_{\text{min}}$ ) and the  $S/2$  ( $= (I_{\text{max}} + I_{\text{min}})/2$ ) are plotted with the varying exposure times and fitted linearly (Fig. 1 c, *top*).
- d. The slope of the first branch is also plotted with the varying exposure times for all the line profiles (Fig. 1 c, *bottom*).
- e. Next, cells are imaged in IRM keeping exposure time fixed at 50 ms (Fig. S1 a).
  - a). To obtain the cell's  $I_{\text{max}}$ , the whole cell is manually searched for pixels with high intensity values (avoiding the nucleus) (Fig. S1 a, *right*). Such maximum intensity pixels lying close (within 15 x 15 pixels) to minimas (such that when connected by a line do not cross any other maxima, Fig. S1 b) are noted down, averaged and termed as  $I_{\text{max}}$ .
- f. The cell's  $S/2$  is calculated from the IRM images of the cell by three methods
  - i. Method 1: The  $I_{\text{max}}$  and  $I_{\text{min}}$  obtained from line scans (Fig. S1 a, *right*, Fig. S1 b) are used to calculate  $S/2_{\text{method 1}} ((I_{\text{max}} + I_{\text{min}}) / 2)$ .
  - ii. Method 2: Large 70 x 70 pixels regions are selected inside the cell (avoiding the nucleus) (Fig. S1 a) and the mean intensity from such regions are measured as  $S/2_{\text{method2}}$ .
  - iii. Method 3: Large 50 x 50 pixels regions are selected outside the cell (Fig. S1 a) and the mean intensity from such regions are measured as  $S/2_{\text{method3}}$ .

Note that the measurement/calculation of the S/2 is done in more than 20 cells in each day. It is seen that the values of S/2 calculated from the three methods are similar to each other.

Henceforth, the third method is employed for analysis since it doesn't require the actual  $I_{\min}$  to be attained at any point in the cell by close attachment of the membrane to substrate.

- g. The value of S/2 obtained from the cell is used to identify the exposure time at which the bead is expected to have the same value of S/2. The exposure time is noted and  $I_{\max}$ ,  $I_{\min}$  and slope ( $\Delta I/\Delta h$ ) of the bead at the same exposure time is read out from the respective plots (Fig. 1 c). All the three methods used for obtaining the cell's S/2 are seen to be well correlated with that of the bead (Fig. S1 c)
- h. The corresponding D ( $= 2I_{\max} - S$ ) is next calculated (Table S1).
- i. The values of the  $I_{\max}$ , S/2 and D are compared between the cell (Table S1) and the bead and is seen to be within an error of 10% from each other.

We next justify that if the bead profile has the same D, slope of intensity-height profiles of beads can indeed be used for converting  $\Delta I$  to  $\Delta h$  in cells though their reflectivities differ.

## 2. Justification of method of calibration.

The interference due to the reflection off the surface of the bead can be described theoretically as (1):

$$I = I_1 + I_2 + 2\sqrt{I_1 I_2} \cos[2kh(x, y) + \phi] \quad \text{Eq. (2)}$$

where a monochromatic incident ray  $I_0$  is first reflected at the glass-medium interface (refractive indices,  $n_0$  and  $n_1$  respectively, Fig. S1 d) to give ray  $I_1$  which is further reflected at the medium-bead interface to give rise to ray  $I_2$  with  $k = \frac{2\pi n_1}{\lambda}$  and  $\phi$  is a phase shift usually equal to  $\pi$ .  $h(x, y)$  is the distance between the bead and the glass substrate at lateral position  $(x, y)$ ,  $\lambda$  is the wavelength of the light used and  $I_1 = r_{01}^2 I_0$ ,  $I_2 = (1 - r_{01}^2) r_{12}^2 I_0$  with Fresnel reflection coefficient  $r_{ij} = \frac{n_i - n_j}{n_i + n_j}$  ( $i, j = 0, 1, 2$ ).

Eq. (2) can be simplified and re-written as

$$2I = S - D\cos[2kh] \quad \text{Eq. (3)}$$

where  $S = I_{max} + I_{min}$  and  $D = I_{max} - I_{min}$  when  $I_{max} = I_1 + I_2 + 2\sqrt{I_1 I_2}$  and  $I_{min} = I_1 + I_2 - 2\sqrt{I_1 I_2}$ .

However, reflections from the cell membrane can be due to multiple interfaces in contrast to the bead's single interface (Fig. S1 d). In such cases, the intensity vs. height profile is expected to be described by (1):

$$2I = S - 2D\cos\{2k[h(x, y) - h_0]\} \quad \text{Eq. (4)}$$

where  $h_0 = -\frac{\lambda}{4\pi n_1} \arctan \frac{\gamma \sin \delta}{1 + \gamma \sin \delta}$ , with  $\gamma = \frac{r_{23}}{r_{12}} (1 - r_{12}^2)$ ,  $\delta = \frac{4\pi n_2 d}{\lambda}$  and  $d$  is the membrane thickness of index  $n_2$ .

Fig. S1 d plots both Eq. 3 (single interface) and Eq. 4 (multiple interfaces) as well as the corresponding linear fits to the central part of the first branch. As observed though the profiles do not match, the slopes are equal (single interface:  $0.01182 \pm 1.44\text{E-}4$ ; multiple interface:  $0.0119 \pm 1.43\text{E-}4$ ). Therefore, the using of slope of the linear part of the intensity vs. height profile from the bead for  $\Delta I$  to  $\Delta h$  conversion for cells is justified.

However, it is also evident, and must be noted, that the bead profile cannot be used for measuring the absolute height of the cell membrane.

Since the  $I_{max}$ ,  $S/2$  and  $D$  between the cell and the bead are strongly correlated (Fig. 1 e), for the next part – identification of FBRs in the cell,  $I_{max}$  and  $I_{min}$  of the bead (imaged on the same day) are used.

### 3. Method of identifying FBRs

#### a. Exclude minimas and maximas

- i. Using Image J, for each pixel, the minimum and maximum intensity reached in the 2048 frames captured is found out and the new images are called the minima and maxima projection respectively.
- ii. A threshold is applied on the minima projection to keep only pixels with intensities ranging from  $I_{min}$  to  $I_{min} + 2000$ . These pixels have been represented in red in Fig.1 g.
- iii. A threshold is applied on the maxima projection to keep only pixels with intensities ranging from  $I_{max} - 2000$  to  $65500$ . These pixels have been represented in green in Fig. 1 g.

- iv. A composite image is constructed by merging the thresholded projections as represented by Fig. 1 g.
- b. Manual drawing of FBRs
  - i. Regions close (1-pixel distance) to red pixels (avoiding the cell nucleus) are selected and square ROIs (12x12 pixels) drawn avoiding any overlap with green pixels (Fig. 1 g).

#### 4. Justification of method to identify FBRs:

The use of minima and maxima projections ensures that a pixel is assigned to be in the first branch only if its intensity never crosses or reaches the  $I_{\min}$  and  $I_{\max}$  throughout the time lapse imaging. Additionally, we use the fact that if we draw a line between a red pixel and a pixel at heights above 100 nm (second branch or higher), the line would traverse intermediate heights and therefore some pixels on the line must reach intensity  $I_{\max}$  of the first branch. To elaborate, a height profile of such a line on the cell is simulated (Fig. S1 f) with the height spacing between adjacent pixels as 2 nm. This is because we calculated height spacing between adjacent pixels in HeLa cells to be  $\sim 1.9 \pm 0.6$  nm (from  $140 \mu\text{m}^2$  in FBRs of a cell, as in Fig. 1 i). The bead's Intensity-Height profile (Fig. 1 b, *bottom*) next is used to read out the corresponding intensities and the resulting intensity plot shows the expected crossing through  $I_{\max}$  (marked out by red arrow).

In our identification of FBRs, we hence do not include pixels which when joined to the nearest minima (red pixels) by a line pass over maximas (green pixels).

#### 5. Check for signatures of active fluctuations in our measurements:

The following three approaches are undertaken:

A) In brief, the temporal ACFs in the FBRs of the cell frequently displayed “bumps” or “peaks”. For quantifying the frequency of occurrence of these features we proceed as follows. The ACF (Figs. 2 a(vi) and 7 a, blue line) is first smoothed using Savitzky-Golay filter (Fig. 7 a, red line) and the slope or spatial derivative is calculated, smoothed and rescaled (30x fold) for visualization on the same plot (Fig. 7 a, green line).

In the absence of bumps, the slope of the ACF has a negative value which monotonically increases with time. For forming features resembling bumps or

peaks the ACF curve first flattens or the slope becomes zero (Fig. 7 a, dashed line) before further increasing. The crossing of zero (or higher threshold values (Th)) by the slope (Fig. 7 a, green line) is computed. Such crossovers located before the intersection of the ACF with the x-axis are considered to represent “bumps” or “peak”. ACF curves with at least one such feature is counted and the ratio of the number of such curves over the total number of curves analyzed is computed and plotted (Fig. 7 b).

Note that increasing Th (from left to right) allows features with increasingly steeper slopes to be chosen (Fig. 7 b). As depicted in Fig. 7 b, with respect to Control cells, in ATP depleted cells the probability of finding steeper features is substantially diminished. In PMS, even lesser fraction of curves is seen to have these features. Averaging ACFs across 12x12 pixels drastically reduces the probability of finding peaks even for Control cells (Fig. 7 b). We believe this implies that the features resembling bumps/peaks may be caused by local cellular activity.

B) We next checked for the existence of any extra timescales in the ACF due to activity that are not necessarily reflected as bumps/peaks. We therefore fitted individual ACFs with a three-term multi-exponential function. Though the sharper peaks cannot be fit the baseline can be captured (Fig. 2 a(vi), solid lines). We collate the timescales and amplitudes from >1900 fits, plot the distribution of timescales weighted with their corresponding amplitudes (Fig. 3 f). On comparing the distributions among the three sets, we find that Control cells have a higher probability of having timescales ranging from 0.2-2.2 sec (Fig. 3 f, black arrow) than ATP depleted cells or PMS. This range overlaps (although having an appreciable spread) with the timescales of events of heterogeneity observed previously (Fig. 6, main text).

We believe that the smaller (<0.1sec) timescales in the distribution originate from thermal motion of the membrane and the larger (>10sec) timescales reflect the slow active/passive relaxation.

C) We also checked the effect of activity on the nature of fluctuations by analysing the height distribution at every pixel. It is reported previously (2), that activity can result in non-Gaussian nature of fluctuations. We check for the normality of the height fluctuations for every pixel using the Kolmogorov-Smirnov hypothesis testing and map the corresponding p values. We observe that the p-values vary non-uniformly across the cell. The background fluctuations are Gaussian (high p value) while



pixels inside the cell have a higher probability to be non-Gaussian (p-value < 0.05). The numbers of pixels with non-Gaussian distributions reduce on ATP depletion which when averaged over FBRs (Fig. 3 g) show significant difference from the control. Therefore, our results indicate that ATP dependent activities lead to non-Gaussian fluctuations in the cell membrane.

From these results, we conclude that the signatures of active fluctuations are very local and not evident on averaging across a length scale of  $2.16 \times 2.16 \mu\text{m}^2$ .

## 6. Fitting of the PSD to a model

We have fitted our PSD( $f$ ) with a model.

$$S(f) = \frac{4\eta_{\text{eff}}Ak_{\text{BT}}}{\pi} \int_{q_{\text{min}}}^{q_{\text{max}}} \frac{dq}{(4\eta_{\text{eff}}(2\pi f))^2 + \left[\kappa q^3 + \frac{9k_{\text{BT}}}{16\pi\kappa}\mu q + \sigma q + \frac{\gamma}{q}\right]^2} \quad \text{Eq. (5)}$$

that is a modified version of (3) and includes the parameters –active temperature ( $A^*T$ ), effective viscosity ( $\eta_{\text{eff}}$ ), bending rigidity ( $\kappa$ ), shear modulus ( $\mu$ ), membrane tension ( $\sigma$ ) and confinement ( $\gamma$ ) as presented in Fig. 7 c. The fitting is performed using MATLAB and fits with  $R^2 > 0.9$  are considered.

The PSDs used for fitting are averaged over single FBRs. It is important to note that the bumps and peaks in the ACF (Fig. 2 a(vi)) are no longer distinguishable when averaged over the whole FBR ( $12 \times 12$  pixels =  $2.16 \mu\text{m} \times 2.16 \mu\text{m}$ ) (Fig. 7 b). We therefore feel it is justified to use the model in comparison to models where the passive thermal motion as well as contributions from active forces are considered (3). In our case the parameter  $A$  (in active temperature  $A^*T$ ) is used to capture the effect of activity (4). From the PSD fits, we obtained a distribution of parameter values (of  $A$ ,  $\eta_{\text{eff}}$ ,  $\kappa$ ,  $\mu$ ,  $\sigma$ , and  $\gamma$ ) as presented in Fig. 7 c. While other parameters fall in the expected range, the  $\eta_{\text{eff}}$  has values much higher ( $\sim 1000$  Pa-sec) than that of water or cytoplasm (0.001-0.01 Pa-sec (5)). We propose the acto-myosin cytoskeleton contributes to the  $\eta_{\text{eff}}$  due to the slow relaxation times of the crosslinked actin network. This is supported by the observation (Fig. 7 c) that  $\eta_{\text{eff}}$  reduces on perturbing the acto-myosin cytoskeleton with Cyto D or Lat B but increases by the action of Jas as well as on ATP depletion. The values of  $\eta_{\text{eff}}$  are also close to predictions from numerical/theoretical estimates (6).

The parameter  $A$  which indicates the degree of contribution of active motions decreases on ATP depletion (from 2.6 to 2) and on Jas treatment (from 2.3 to 1.9). The other treatments do not show in any significant change in the values of  $A$  from their respective controls. In RBCs, ATP depletion has been shown to reduce  $A$  from 3 to 1 (7).

ATP depletion in this study also leads to increase in  $\kappa$ ,  $\mu$ ,  $\sigma$  - as observed in RBCs (3, 8).  $\kappa$  decreases (not significant) on Cyto D or Lat B but increases (significant) on Jas treatment.  $\mu$  decreases on Cyto D and Lat B and increases on Jas treatment – though the changes are statistically not significant.

The increase in membrane tension ( $\sigma$ ) is also seen when the cytoskeleton is perturbed by Cyto D, Lat B, or Jas. Interestingly, in RBCs too, all cytoskeletal or metabolic perturbations have been observed to lead to an increase in tension. Cytoskeleton activity and its mechanical coupling is believed to lead to softening of the membrane (3). In adherent nucleated cells, the presence of endomembrane and the cytoskeleton/ATP dependent trafficking rates need to be investigated separately in future to understand the implication of the rise in tension. Comparing the values of  $\sigma$  for control cells with those obtained from imaging studies (9) or tether–pulling experiments (10), we find the numbers to be in the right range ( $\sim 10$ -450 pN/ $\mu$ m).

We find that the confinement parameter  $\gamma$  to be in the right order of magnitude ( $10^8$ - $10^{10}$ ) as predicted (4) for RBCs ( $10^8$  J/m<sup>4</sup>). We expect the confinement to arise from the cytoskeleton as well as connections with the ECM/ confinement due to the coverslip. We find  $\gamma$  to increase on ATP depletion but decrease on Cyto D, Lat B treatments. However, the  $\gamma$  values do not drop below  $10^8$  which implies the contribution of other sources. Surprisingly Jas treatments also result in reduction of  $\gamma$  and hence we believe that  $\gamma$  is not solely dependent on the presence of intact cytoskeleton.

Finally, the fits also show that the tension in mitotic cells is higher from the interphase cells as is seen in literature (11). Among the other parameters a significant increase in  $\mu$  along with a significant decrease in  $\eta_{\text{eff}}$ ,  $\gamma$  is seen in mitotic cells.

**Table S1**

| Day | Cell                |                     |                     |                     | Bead                |                     |                     |                     | $\Delta I/\Delta h$ |
|-----|---------------------|---------------------|---------------------|---------------------|---------------------|---------------------|---------------------|---------------------|---------------------|
|     | $I_{\min}$ (au)     | $I_{\max}$ (au)     | S/2 (au)            | D (au)              | $I_{\min}$ (au)     | $I_{\max}$ (au)     | S/2 (au)            | D (au)              |                     |
| 1   | 20052 $\pm$<br>2691 | 46461 $\pm$<br>2333 | 33256 $\pm$<br>527  | 26410 $\pm$<br>3561 | 19309 $\pm$<br>157  | 47203 $\pm$<br>2147 | 33256 $\pm$<br>1106 | 27895 $\pm$<br>2152 | 320                 |
| 2   | 20791 $\pm$<br>3246 | 46505 $\pm$<br>2090 | 33648 $\pm$<br>694  | 25714 $\pm$<br>4359 | 18960 $\pm$<br>155  | 46335 $\pm$<br>2123 | 32648 $\pm$<br>1094 | 27376 $\pm$<br>2129 | 320                 |
| 3   | 21454 $\pm$<br>2678 | 45407 $\pm$<br>2778 | 33431 $\pm$<br>857  | 23954 $\pm$<br>3858 | 19409 $\pm$<br>157  | 47452 $\pm$<br>2153 | 33430 $\pm$<br>1109 | 28044 $\pm$<br>2159 | 320                 |
| 4   | 12652 $\pm$<br>2740 | 34123 $\pm$<br>2201 | 23387 $\pm$<br>912  | 21472 $\pm$<br>3514 | 13196 $\pm$<br>336  | 33576 $\pm$<br>888  | 23386 $\pm$<br>577  | 20381 $\pm$<br>949  | 290                 |
| 5   | 27175 $\pm$<br>2099 | 45242 $\pm$<br>1829 | 36208 $\pm$<br>1263 | 18068 $\pm$<br>2784 | 25498 $\pm$<br>1055 | 46916 $\pm$<br>2264 | 36207 $\pm$<br>1599 | 21418 $\pm$<br>2498 | 210                 |
| 6   | 22326 $\pm$<br>2990 | 42481 $\pm$<br>1820 | 32403 $\pm$<br>908  | 20155 $\pm$<br>3500 | 22404 $\pm$<br>243  | 42404 $\pm$<br>901  | 32404 $\pm$<br>493  | 20001 $\pm$<br>933  | 200                 |
| 7   | 8079 $\pm$<br>1355  | 16665 $\pm$<br>1092 | 12372 $\pm$<br>465  | 8586 $\pm$<br>1740  | 8447 $\pm$<br>41    | 16298 $\pm$<br>210  | 12372 $\pm$<br>103  | 7852 $\pm$<br>214   | 94                  |
| 8   | 9669 $\pm$<br>1042  | 16769 $\pm$<br>801  | 13219 $\pm$<br>312  | 7101 $\pm$<br>1314  | 9125 $\pm$<br>46    | 17312 $\pm$<br>179  | 13219 $\pm$<br>89   | 8188 $\pm$<br>185   | 90                  |
| 9   | 8128 $\pm$<br>1173  | 15782 $\pm$<br>1027 | 11955 $\pm$<br>268  | 7654 $\pm$<br>1559  | 8071 $\pm$<br>106   | 15839 $\pm$<br>553  | 11955 $\pm$<br>303  | 7768 $\pm$<br>563   | 90                  |
| 10  | 9094 $\pm$<br>15054 | 19709 $\pm$<br>1451 | 14402 $\pm$<br>260  | 10616 $\pm$<br>2090 | 8429 $\pm$<br>99    | 20375 $\pm$<br>399  | 14402 $\pm$<br>198  | 11947 $\pm$<br>411  | 130                 |
| 11  | 7804 $\pm$<br>1263  | 17396 $\pm$<br>1096 | 12600 $\pm$<br>469  | 9593 $\pm$<br>1672  | 7170 $\pm$<br>73    | 18030 $\pm$<br>627  | 12600 $\pm$<br>286  | 10861 $\pm$<br>631  | 100                 |
| 12  | 6551 $\pm$<br>1209  | 17900 $\pm$<br>1267 | 12225 $\pm$<br>362  | 11349 $\pm$<br>1751 | 8025 $\pm$<br>166   | 16425 $\pm$<br>312  | 12225 $\pm$<br>222  | 8400 $\pm$<br>353   | 82                  |
| 13  | 5779 $\pm$<br>998   | 13130 $\pm$<br>935  | 9455 $\pm$<br>299   | 7352 $\pm$<br>1367  | 6727 $\pm$<br>73    | 12181 $\pm$<br>156  | 9454 $\pm$<br>98    | 5455 $\pm$<br>173   | 80                  |
| 14  | 13855 $\pm$<br>1538 | 28868 $\pm$<br>1629 | 21362 $\pm$<br>462  | 15014 $\pm$<br>2240 | 12481 $\pm$<br>137  | 30246 $\pm$<br>245  | 21363 $\pm$<br>119  | 17765 $\pm$<br>280  | 189                 |
| 15  | 11983 $\pm$<br>1449 | 28189 $\pm$<br>1457 | 20086 $\pm$<br>395  | 16206 $\pm$<br>2055 | 10625 $\pm$<br>71   | 29546 $\pm$<br>210  | 20086 $\pm$<br>110  | 18922 $\pm$<br>221  | 215                 |
| 16  | 7177 $\pm$<br>1418  | 18173 $\pm$<br>1196 | 12675 $\pm$<br>385  | 10996 $\pm$<br>1855 | 7392 $\pm$<br>182   | 17958 $\pm$<br>2032 | 12675 $\pm$<br>1021 | 10566 $\pm$<br>2040 | 108                 |
| 17  | 5546 $\pm$<br>1066  | 16925 $\pm$<br>1012 | 11235 $\pm$<br>157  | 11379 $\pm$<br>1470 | 6620 $\pm$<br>74    | 15850 $\pm$<br>583  | 11235 $\pm$<br>292  | 9230 $\pm$<br>588   | 119                 |
| 18  | 6562 $\pm$<br>846   | 15216 $\pm$<br>821  | 10889 $\pm$<br>188  | 8654 $\pm$<br>1179  | 5614 $\pm$<br>278   | 16164 $\pm$<br>1381 | 10889 $\pm$<br>818  | 10551 $\pm$<br>1408 | 119                 |
| 19  | 5804 $\pm$<br>1192  | 15549 $\pm$<br>1148 | 10677 $\pm$<br>158  | 9745<br>$\pm$ 1655  | 5514 $\pm$<br>73    | 15840 $\pm$<br>244  | 10677 $\pm$<br>134  | 10326 $\pm$<br>254  | 116                 |
| 20  | 6270<br>$\pm$ 897   | 13838 $\pm$<br>815  | 10054 $\pm$<br>269  | 7569 $\pm$<br>1212  | 5821 $\pm$<br>51    | 14289 $\pm$<br>318  | 10055 $\pm$<br>169  | 8468 $\pm$<br>322   | 102                 |

**Values of the calibration used for analysis**

Values of  $I_{\max}$ ,  $I_{\min}$ , S/2 and D for cells and beads on different days and corresponding  $\Delta I/\Delta h$  conversions used for analysis. Details in Supporting Discussion.

**Figure S1**

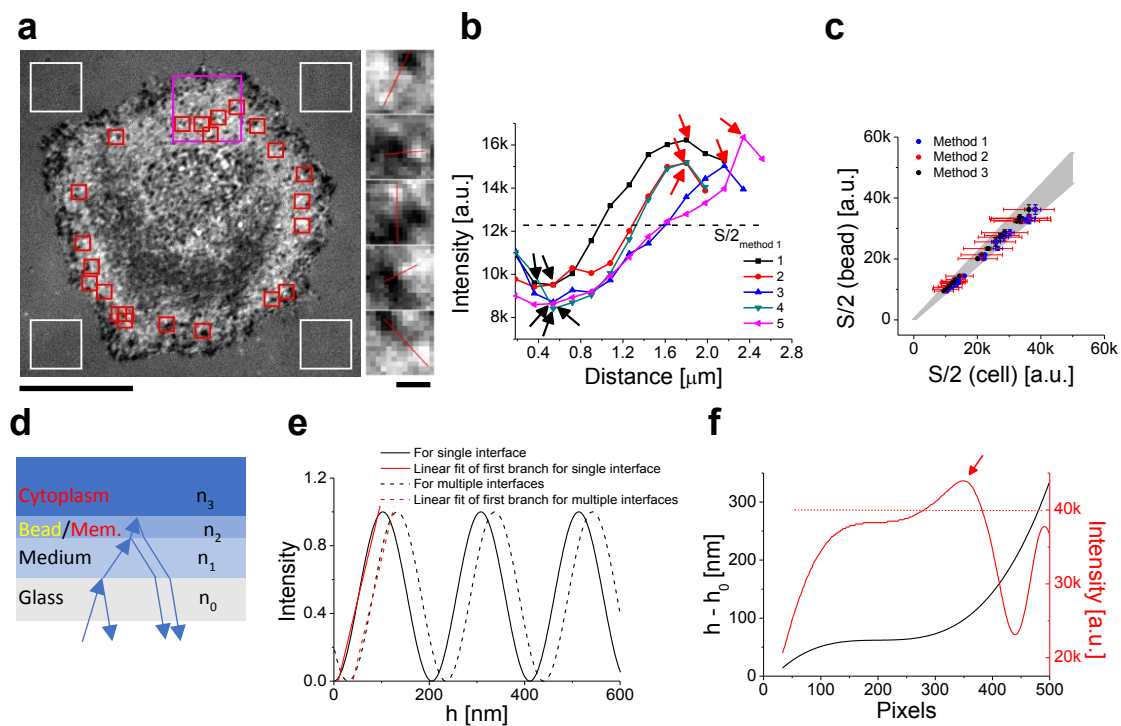

**Figure S1. Justification of calibration with beads.**

(a) Left: A representative IRM image of a HeLa cell with ROIs marked in red, magenta and white to calculate  $S/2$  by methods 1, 2 and 3 (see Supporting Discussion) respectively. Scale bar:  $10\ \mu\text{m}$ . Right: Zoomed-in views of five FBRs with lines in red passing between minimas and maximas. Scale bar:  $1\ \mu\text{m}$ . (b) Profiles of lines shown in right panel of (a). Red and black arrows mark out  $I_{\text{max}}$  and  $I_{\text{min}}$  respectively and the dashed line represents  $S/2_{\text{method 1}}$ . (c) A comparison of  $S/2$  in beads and cells (by the three methods),  $N = 20$  days. Grey region covers  $y = x \pm 0.1 x$ . (d) A schematic diagram of rays traversing through glass-medium and a single interface at the object's surface (marked as bead in yellow, relevant interfaces  $n_0$ - $n_2$ ) or multiple interfaces due to the presence of membrane as well as cytoplasm (marked in red, relevant indices  $n_0$ - $n_3$ ). (e) A comparison of simulated intensity vs. height profiles of interferences due to single and multiple interfaces with first branch fitted to a line. (f) Simulation of height and intensity for a cell with  $\sim 2\ \text{nm}$  as the height spacing between two pixels. Arrow shows the  $I_{\text{max}}$  and the dotted line denotes  $I_{\text{max}} - 2000$  which is used for thresholding.

**Figure S2**

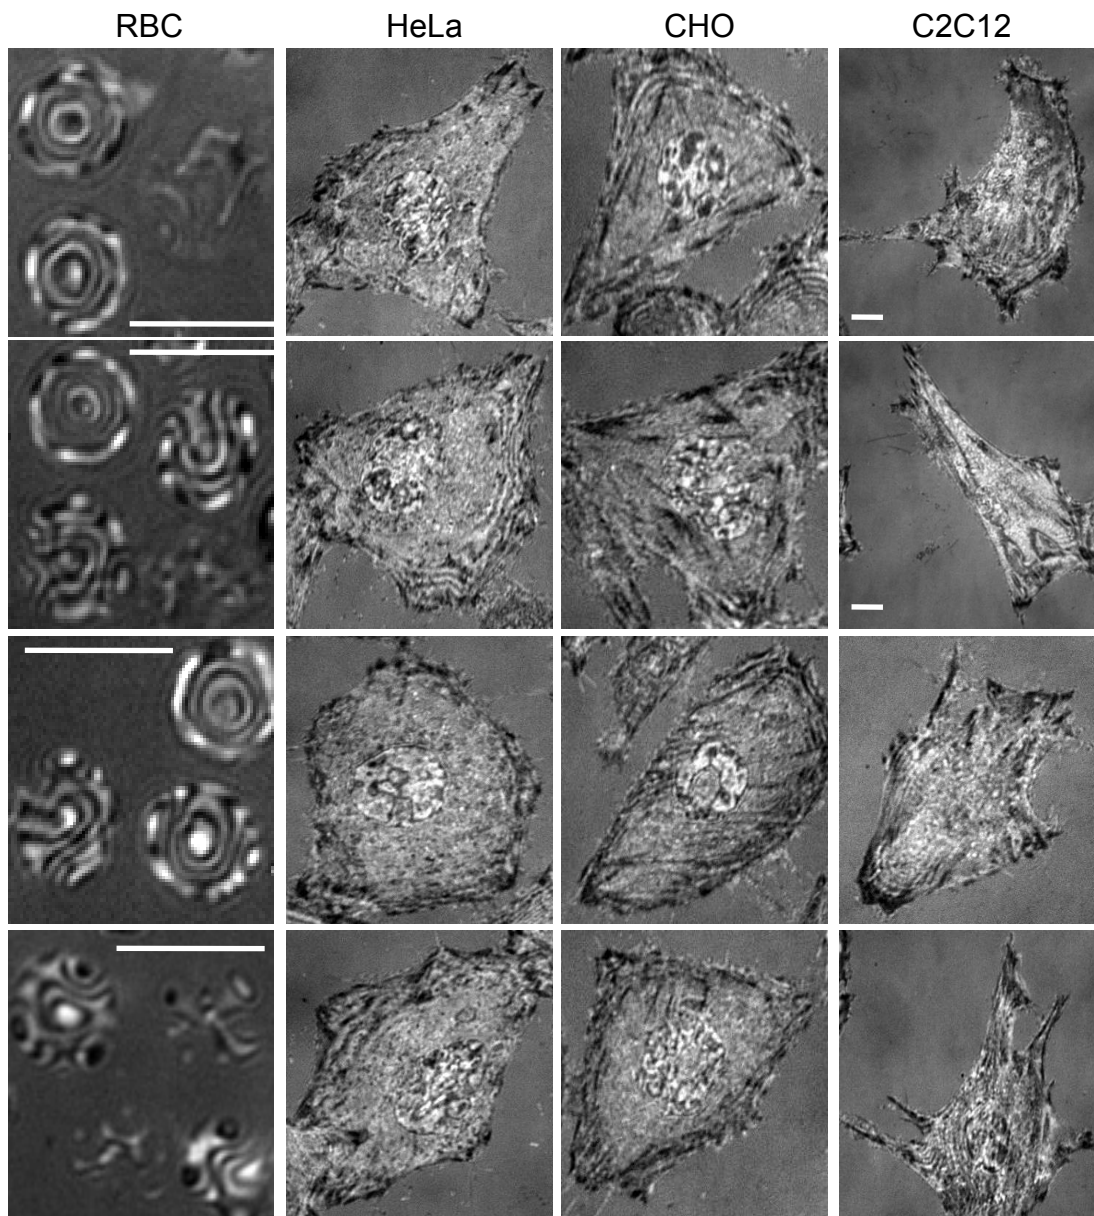

**Figure S2. IRM shows heterogeneous membrane topology in cells.**

Representative IRM images of adhered RBC, HeLa, CHO and C2C12 cells. Scale bar: 10 μm.

**Figure S3**

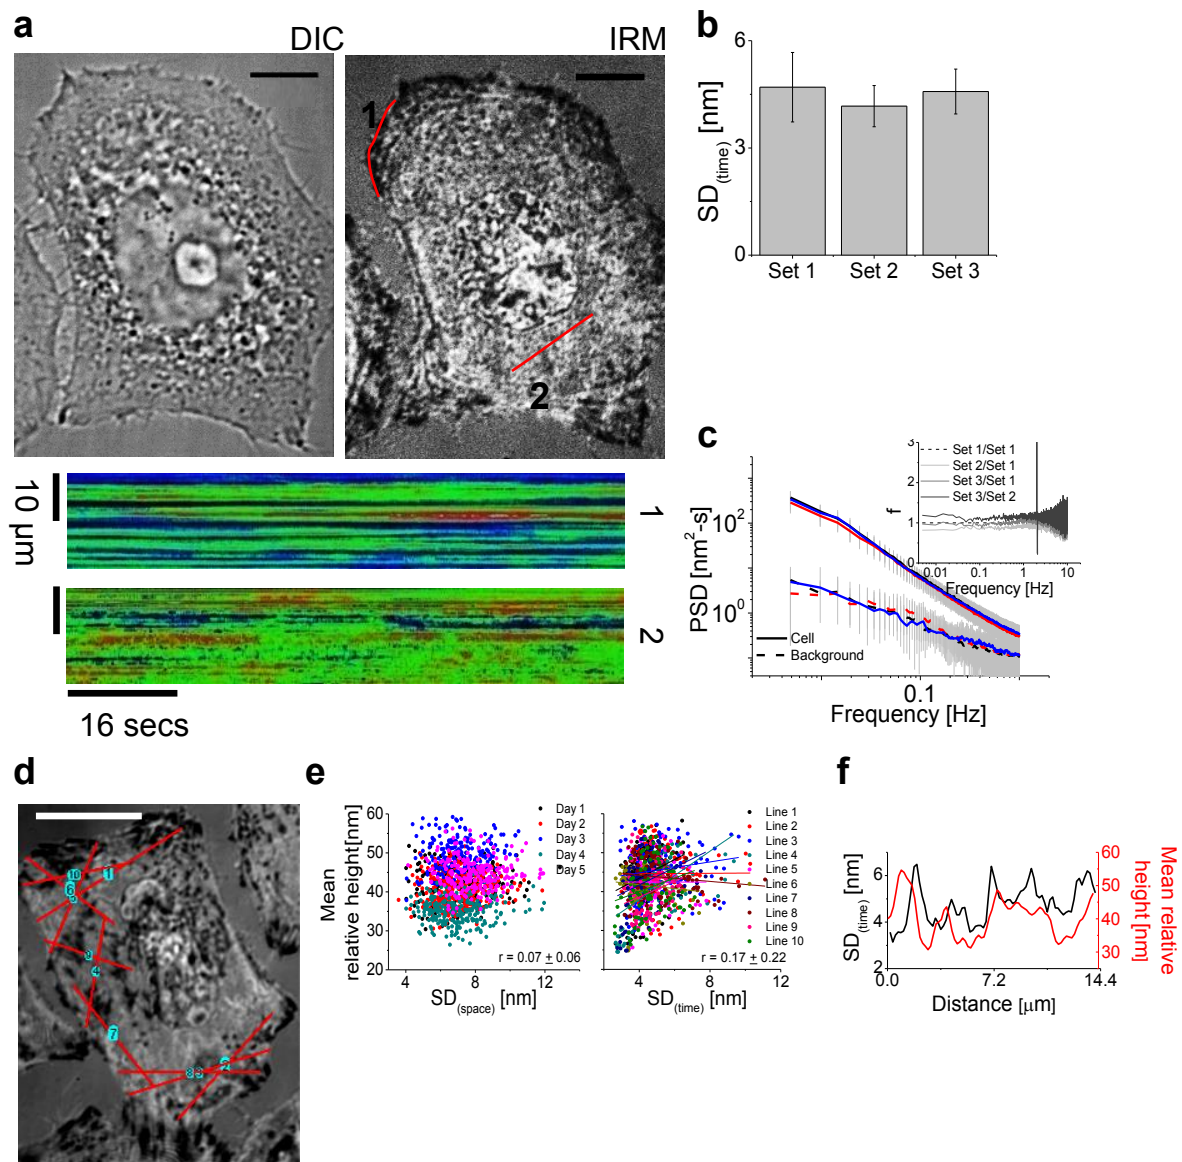

**Figure S3. Temporal fluctuations and its variability.**

(a) Representative images of a HeLa cell in the DIC and IRM modes (top). The temporal fluctuations across regions in a cell measured by kymographs at the marked ROIs, 1: on the focal adhesions and 2: inside the cell (bottom). (b) Temporal fluctuations across sets of experiments (N=10 cells each set) measured by  $SD_{(time)}$ . (c) Averaged PSDs of FBRs in cells across days and their backgrounds with inset showing  $f$  for the different days. (d) Line scans (red) in FBRs overlaid on a HeLa cell. Scale bar: 10  $\mu m$ . (e) Plots of  $SD_{(space)}$  vs. Mean relative height (left) and  $SD_{(time)}$  vs. Mean relative height (right) with the average Pearson Correlation

Coefficient ( $r$ ) mentioned in each. (f) The spatial profile of  $SD_{(time)}$  (black) and Mean relative height (red) for two typical line scans.

**Figure S4**

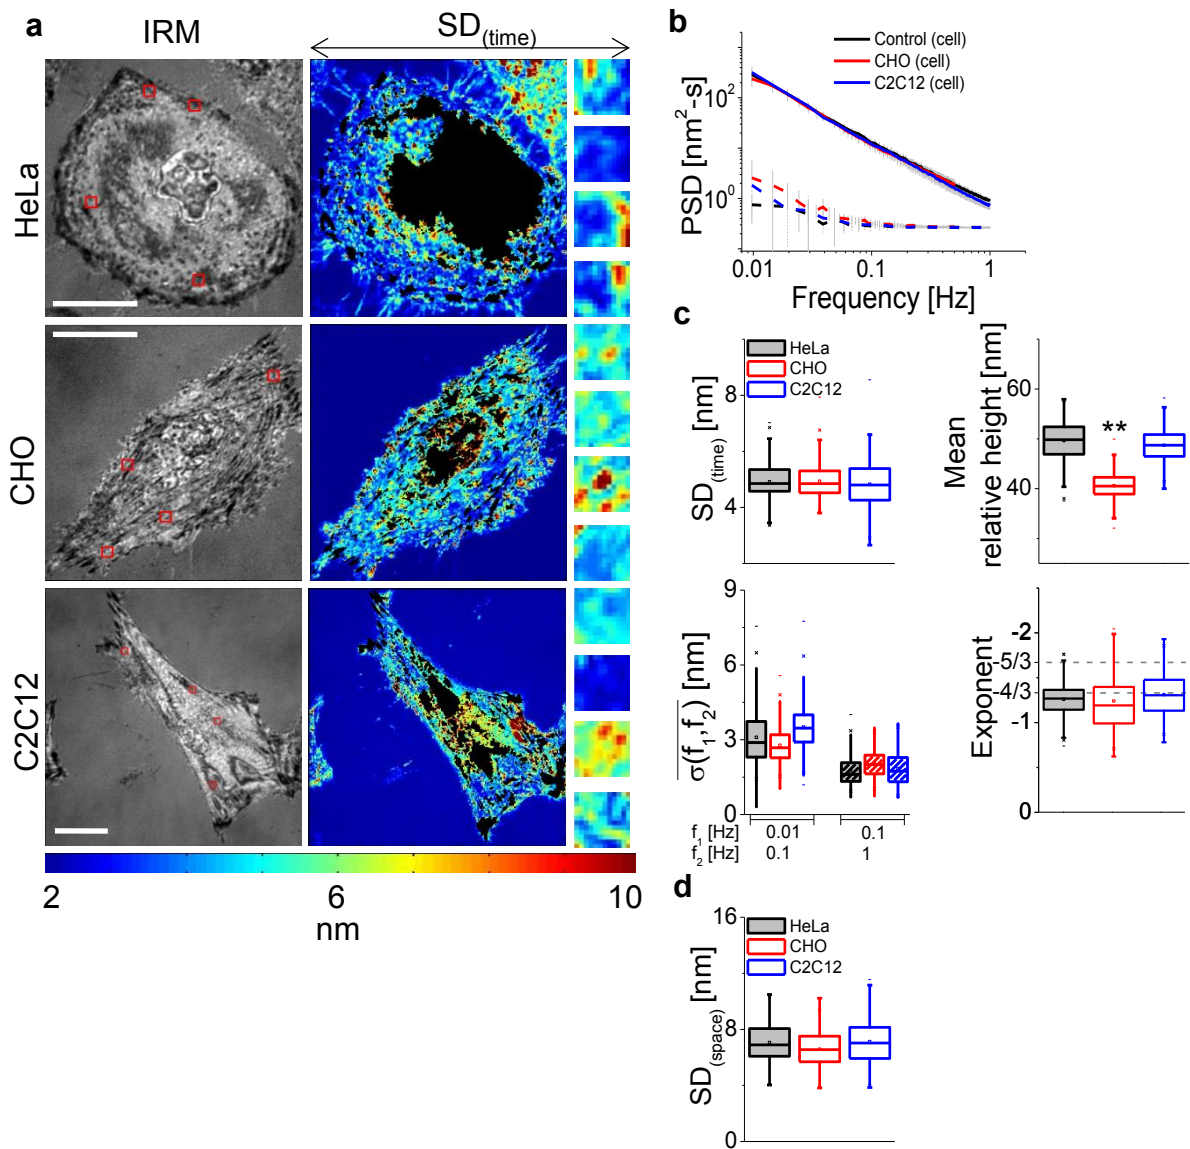

**Figure S4. Similar trends of membrane fluctuations across three cell lines.**

(a) IRM images (left, scale bar: 10  $\mu\text{m}$ ),  $SD_{(time)}$  maps of the whole cells (middle, non-FBR regions blocked in black) and of four marked FBRs (right, scale bar: 1  $\mu\text{m}$ ) of HeLa, CHO and C2C12 cells. (b) The averaged PSDs of cells ( $N = 10$  each,  $n_{\text{HeLa}} = 197$  FBRs,  $n_{\text{CHO}} = 175$  FBRs and  $n_{\text{C2C12}} = 219$  FBRs, solid lines) and their respective backgrounds (dashed lines). (c) The



parameters of temporal fluctuations. (d) The parameters of spatial undulations. (\*\* p < 0.001, One-way ANOVA). See also Table S4.

**Table S2**

| Conditions      | $\overline{\sigma(0.01Hz, 0.1Hz)}$ | $\overline{\sigma(0.1Hz, 1Hz)}$ | Exponent   | SD <sub>(time)</sub> | SD (SD <sub>(time)</sub> ) | Dissimilar pairs | SD <sub>(space)</sub> | $\lambda$     |
|-----------------|------------------------------------|---------------------------------|------------|----------------------|----------------------------|------------------|-----------------------|---------------|
|                 | nm                                 | nm                              |            | nm                   | nm                         | %                | nm                    | nm            |
| Control         | 3.0 ± 0.8                          | 1.8 ± 0.5                       | -1.4 ± 0.3 | 5.0 ± 1.2            | 0.9 ± 0.3                  | 63 ± 12          | 7.3 ± 1.7             | 505.5 ± 284.9 |
| ATP dep.        | 2.1 ± 1.0                          | 1.2 ± 0.4                       | -0.9 ± 0.2 | 3.9 ± 1.0            | 0.6 ± 0.4                  | 59 ± 17          | 7.7 ± 2.3             | 478.0 ± 279.4 |
| Cyto D          | 3.2 ± 0.8                          | 2.4 ± 0.5                       | -1.3 ± 0.2 | 5.5 ± 0.8            | 1.1 ± 0.3                  | 66 ± 14          | 7.9 ± 1.3             | 443.1 ± 173.7 |
| Lat B           | 3.4 ± 0.8                          | 2.5 ± 0.5                       | -1.3 ± 0.2 | 5.9 ± 0.8            | 1.1 ± 0.3                  | 62 ± 13          | 7.9 ± 1.5             | 433.9 ± 183.0 |
| Jas             | 2.9 ± 0.7                          | 2.0 ± 0.4                       | -1.1 ± 0.2 | 4.3 ± 0.6            | 0.8 ± 0.3                  | 65 ± 11          | 8.9 ± 1.5             | 450.6 ± 230.5 |
| Blebb. (5 μM)   | 3.0 ± 0.7                          | 1.7 ± 0.4                       | -1.3 ± 0.2 | 5.1 ± 0.7            | 0.9 ± 0.3                  | 62 ± 8           | 7.9 ± 1.4             | -             |
| Blebb. (100 μM) | 3.1 ± 0.9                          | 1.7 ± 0.5                       | -1.3 ± 0.2 | 5.1 ± 0.9            | 1.1 ± 0.3                  | 64 ± 10          | 7.9 ± 1.4             | 497.9 ± 240.4 |
| Mitosis         | 2.3 ± 1.1                          | 2.0 ± 0.5                       | -0.9 ± 0.9 | 4.8 ± 0.8            | 0.8 ± 0.3                  | 67 ± 15          | 5.6 ± 2.2             | 418.2 ± 135.3 |

**Parameters of temporal fluctuations and spatial undulations of HeLa cells under different conditions.**

Cells highlighted in light and deep blue denote a significant decrease from the control with p-value < 0.05 and p-value < 0.001 respectively. Cells highlighted in yellow and red denote a significant increase from the control with p-value < 0.05 and p-value < 0.001 respectively. Parameters having values with no significant difference to the control are not highlighted. Mann-Whitney U test is done only on values of  $\lambda$ . For all the other parameters, a one-way ANOVA is done.

**Figure S5**

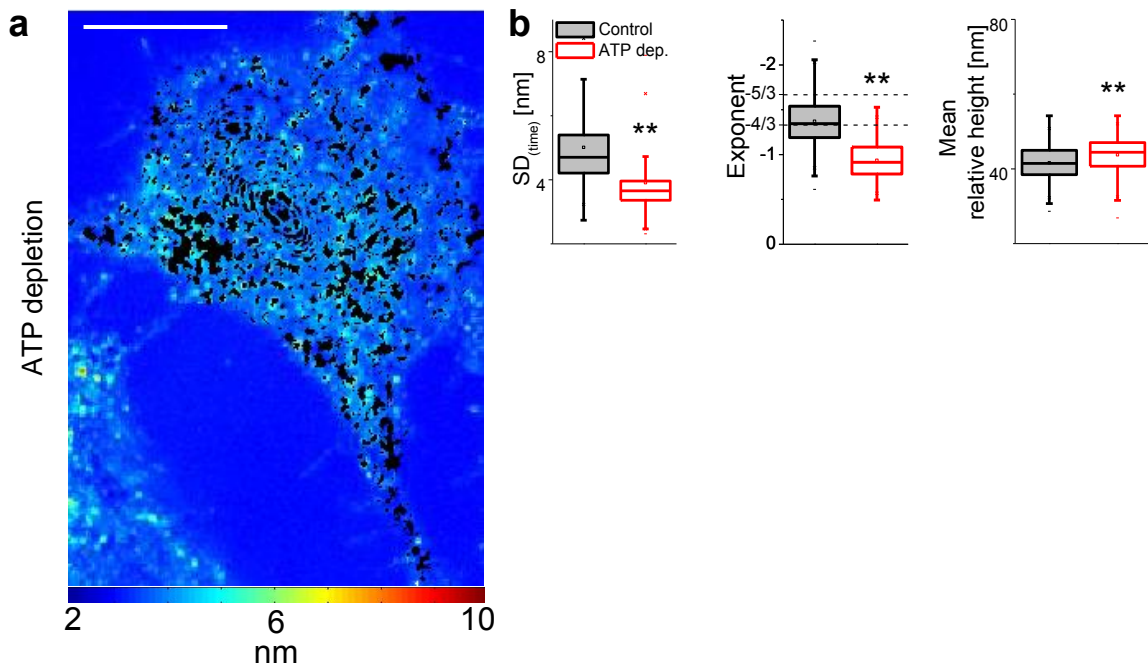

**Figure S5. Detailed parameters of the effect of ATP driven processes on membrane fluctuations.**

(a) Representative whole cell  $SD_{(time)}$  map (non-FBR regions blocked in black) of an ATP depleted HeLa cell. Scale bar: 20  $\mu\text{m}$ . (b) The parameters of temporal fluctuations ( $SD_{(time)}$ , Exponent and Mean relative height) in the two conditions (N = 30 cells each,  $n_{\text{control}} = 854$  FBRs,  $n_{\text{ATPdep}} = 964$  FBRs). Asterisks indicate a significant difference (\*\*  $p < 0.001$ , one-way ANOVA). See also Tables S2 and S4.

**Figure S6**

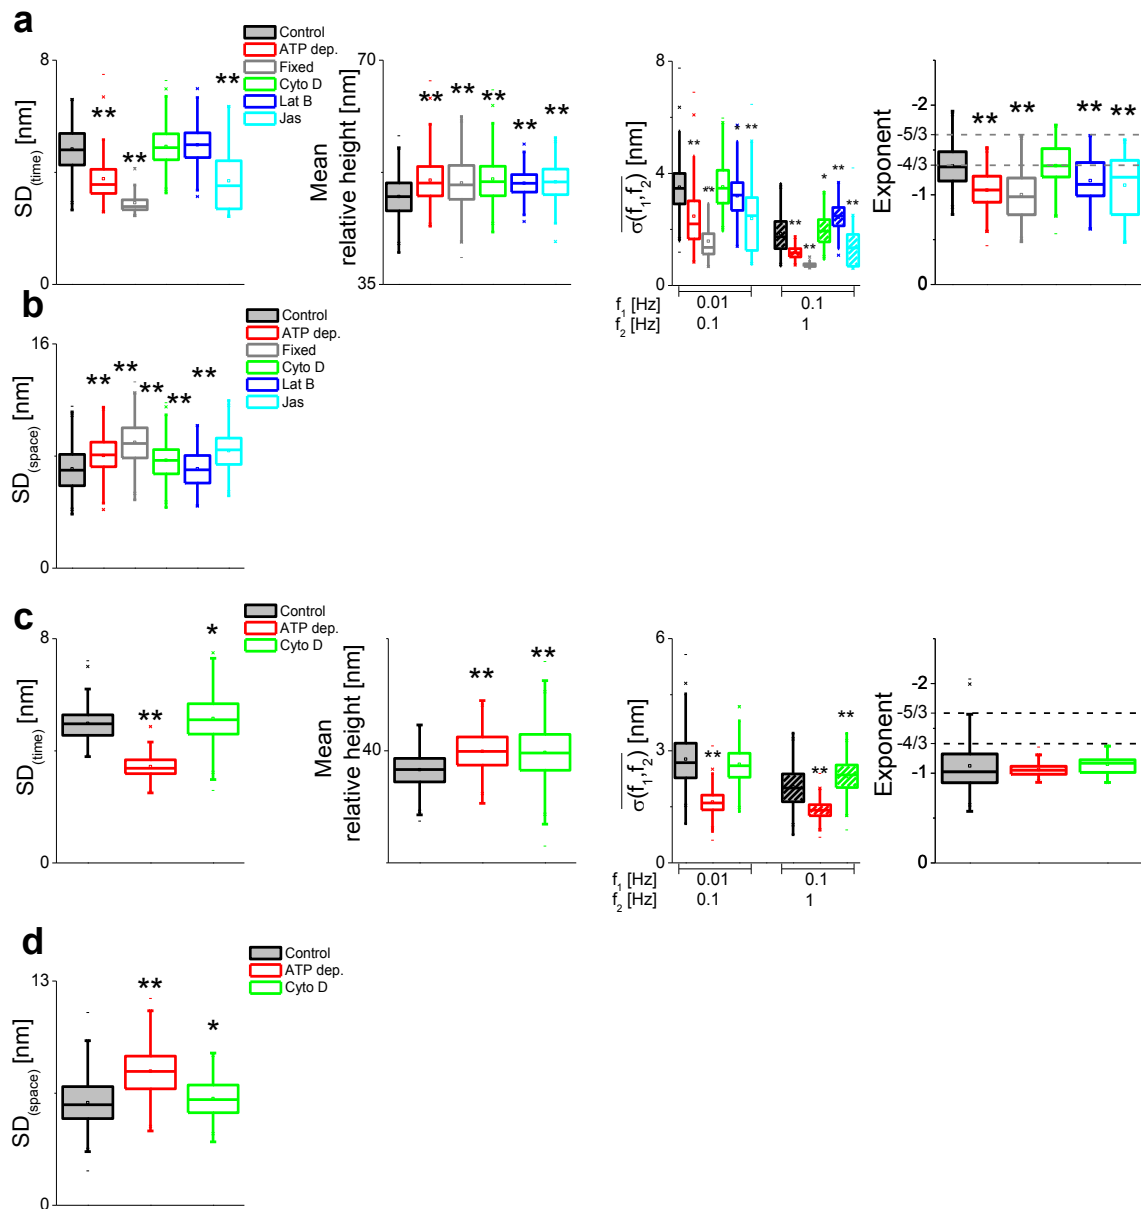

**Figure S6. Detailed parameters of the behavior of cell lines under different conditions.**

(a) The parameters of temporal fluctuations and (b) parameters of spatial undulations in C2C12 cells. ( $N = 10$  cells each,  $n_{control} = 219$  FBRs,  $n_{ATPdep.} = 139$  FBRs,  $n_{fixed} = 171$  FBRs,  $n_{CytoD} = 176$  FBRs,  $n_{LatB} = 79$  FBRs and  $n_{Jas} = 120$  FBRs). (c) The parameters of temporal fluctuations and (d) parameters of spatial undulations in CHO cells. ( $N = 10$  cells each,  $n_{control} = 143$  FBRs,  $n_{ATPdep.} = 161$  FBRs and  $n_{CytoD} = 137$  FBRs). See also Table S4.

**Figure S7**

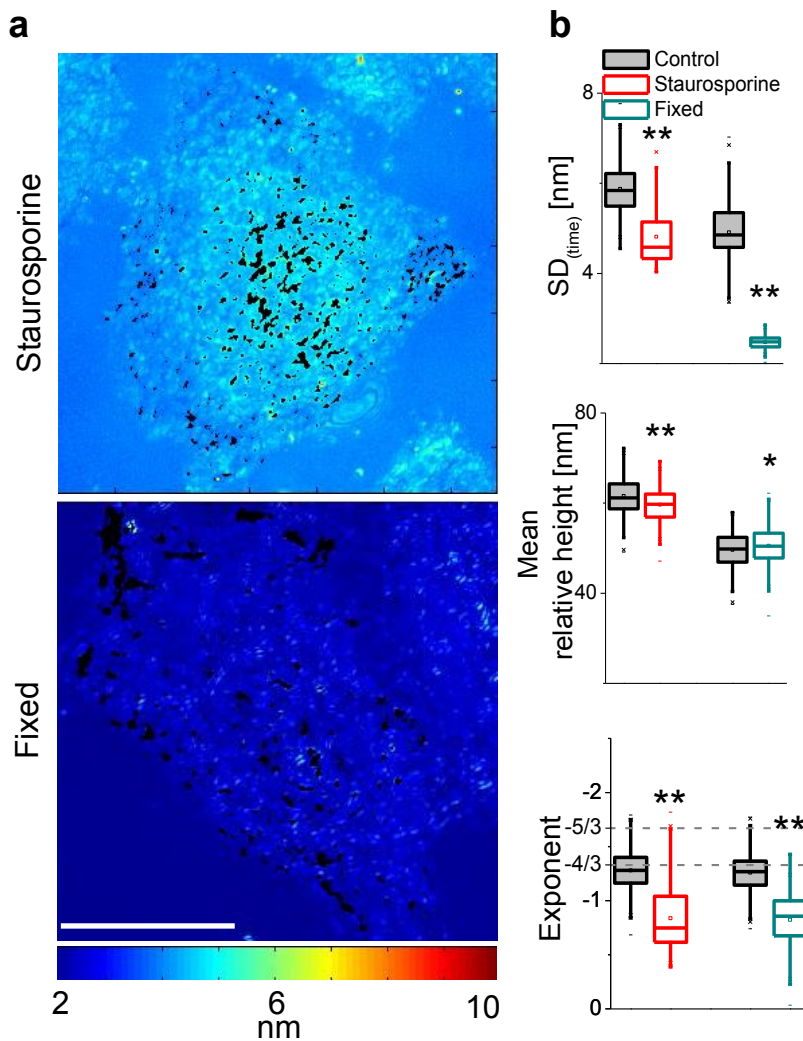

**Figure S7. Detailed parameters capturing the effect of stopping cellular activity.**

(a) Representative  $SD_{(time)}$  maps (non-FBR regions blocked in black) of whole cells after Staurosporine treatment (left panel) and fixation (right panel). Scale bar: 10  $\mu\text{m}$ . (b) The parameters of temporal fluctuations ( $SD_{(time)}$ , Mean relative height and Exponent) in the three conditions ( $N = 10$  cells each,  $n_{\text{control}} = 411$  FBRs,  $n_{\text{staurosporine}} = 310$  FBRs and  $n_{\text{fixed}} = 331$  FBRs). Asterisks indicate a significant difference (\*  $p < 0.05$ , \*\*  $p < 0.001$ , One-way ANOVA). See also Tables S2 and S4.

**Figure S8**

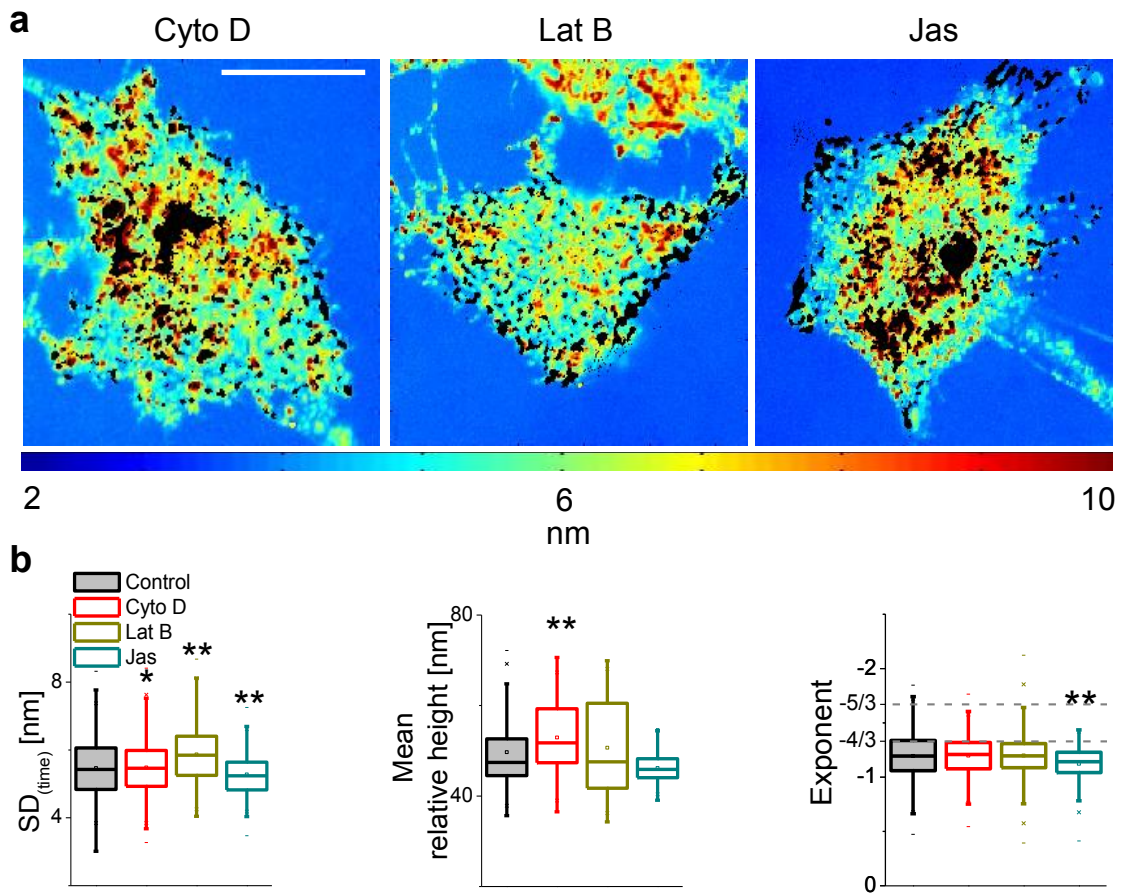

**Figure S8. Detailed parameters on the effect of the cortex on membrane fluctuations.**

(a) Representative  $SD_{(time)}$  maps (non-FBR regions blocked in black) of a whole cell for Cyto D (left), Lat B (middle) and Jas (right) treated cells. Scale bar: 10  $\mu$ m. (b) The parameters of temporal fluctuations ( $SD_{(time)}$ , Mean relative height and Exponent) in the different conditions ( $N = 30$  each,  $n_{control} = 770$  FBRs,  $n_{Cyto D} = 509$  FBRs,  $n_{Lat B} = 484$  FBRs and  $n_{Jas} = 255$  FBRs). Asterisks indicate a significant difference (\*  $p < 0.05$ , \*\*  $p < 0.001$ , One-way ANOVA). See also Tables S2 and S4.

**Figure S9**

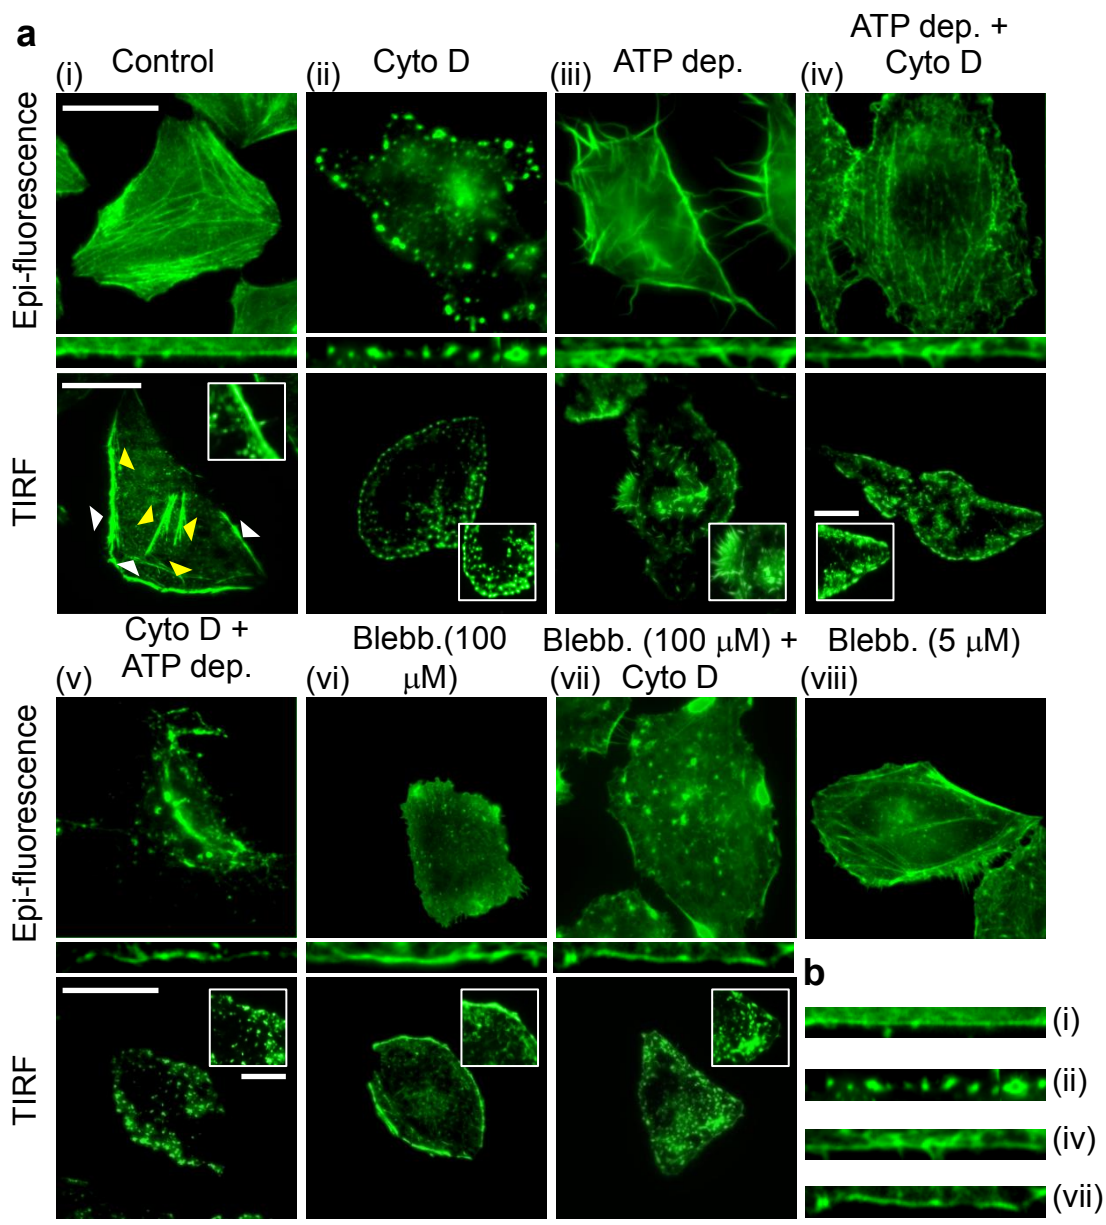

**Figure S9. Quantification of cortical actin present under different conditions.**

(a) Representative images of Alexa Fluor 488 Phalloidin stained cells captured in the Epi-fluorescence and TIRF (penetration depth 100 nm) modes in all the conditions (zoomed-in view in the inset, scale bar: 1 μm) along with linearized images of the cortical actin (middle) from the epi-fluorescent images. Scale bar: 10 μm. White arrowheads mark out the cortex at the edge while the yellow ones represent the stress fibres. (b) Representative images of the straightened cortex which show that pre-treatments stop cortex clearance on addition of Cyto D. Scale bar: 10 μm.

**Figure S10**

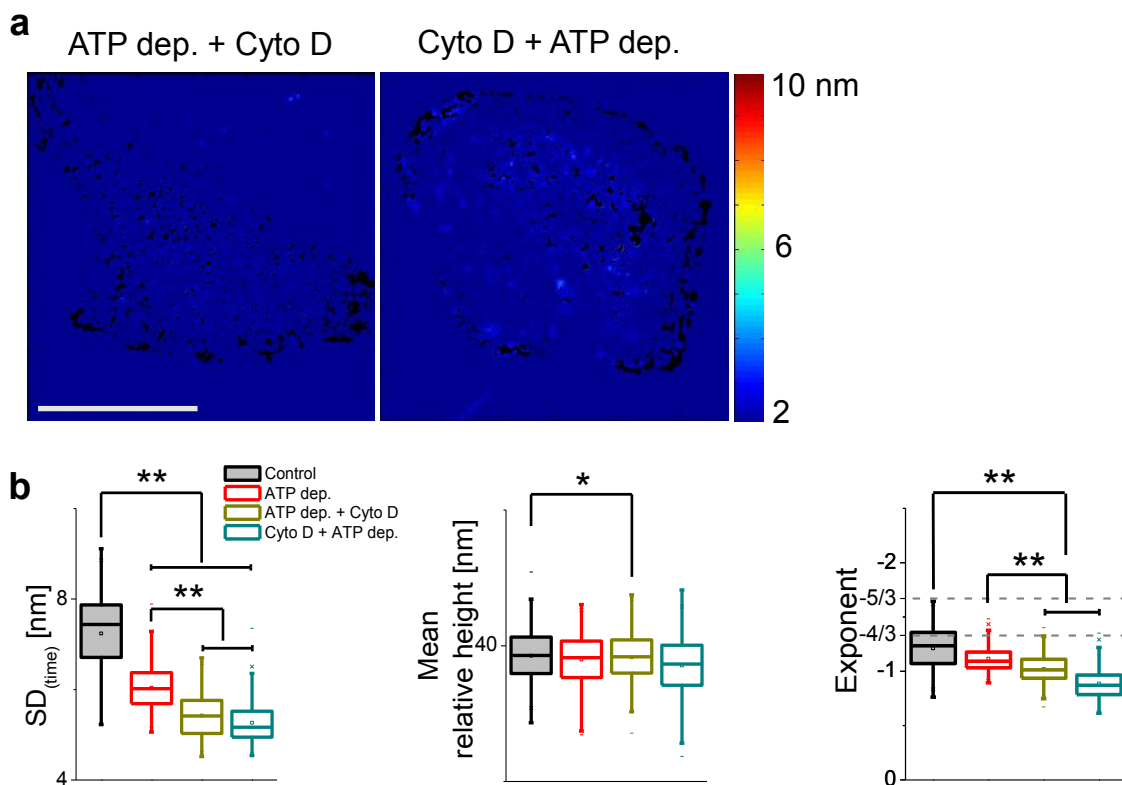

**Figure S10. Detailed parameters towards the effect of polymerization while the Cyto D induced cortex clearance is blocked by ATP depletion.**

(a) Representative  $SD_{(time)}$  maps (non-FBR regions blocked in black) of a whole cell for ATP dep. + Cyto D treated (left) and Cyto D treated + ATP dep. (right) cells. Scale bar: 10  $\mu\text{m}$ . (b) The parameters of temporal fluctuations ( $SD_{(time)}$ , Mean relative height and Exponent) in the different conditions ( $N = 10$  each,  $n_{\text{control}} = 119$  FBRs,  $n_{\text{ATPdep.}} = 158$  FBRs,  $n_{\text{ATPdep.+Cyto D}} = 254$  FBRs and  $n_{\text{Cyto D+ATPdep.}} = 162$  FBRs). Asterisks indicate a significant difference (\*  $p < 0.05$ , \*\*  $p < 0.001$ , One-way ANOVA). See also **Tables S2 and S4**.

**Figure S11**

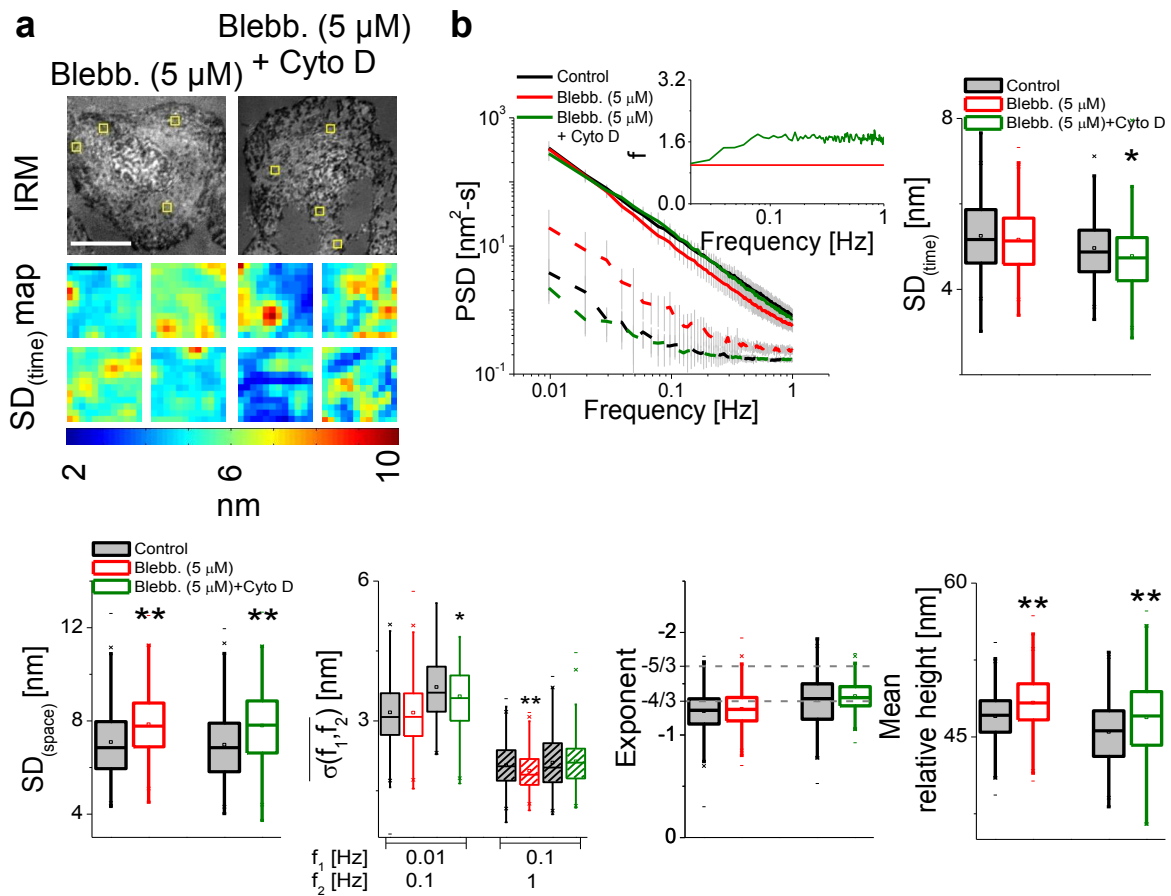

**Figure S11. Low concentration of Blebb. affects fluctuations and does not stop cortex clearance by Cyto D.**

(a) Representative IRM images (top, scale bar: 10 μm) and  $SD_{(time)}$  maps (non-FBR regions blocked in black) of FBRs (bottom, scale bar: 1 μm) of control, Blebb. (5 μM), Cyto D after Blebb (5 μM) treated HeLa cells. (b) The averaged PSDs of cells ( $N = 10$  each,  $n_{control} = 175$  FBRs,  $n_{Blebb.} = 190$  FBRs and  $n_{Blebb.+CytoD} = 90$  FBRs, solid lines) and their respective backgrounds (dashed lines);  $f$  in inset (Blebb. (5 μM) used as control for this measurement) with the parameters of spatio-temporal fluctuations. Asterisks indicate a significant difference (\*  $p < 0.05$ , \*\*  $p < 0.001$ , One-way ANOVA). See also **Tables S2 and S4**.



**Figure S12**

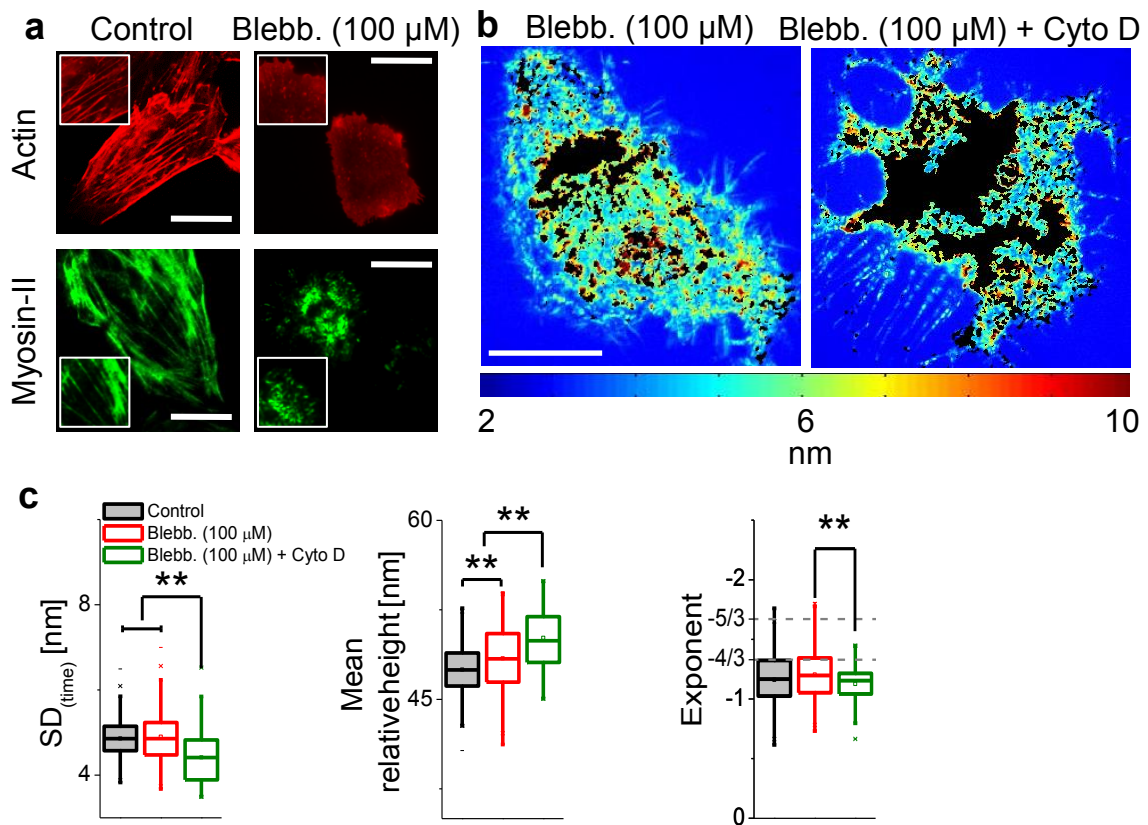

**Figure S12. Detailed parameters towards the effect of polymerization on blocking Cyto D induced cortex clearance by pretreatment with Blebb. at a higher concentration.**

(a) Representative epi-fluorescence images of actin (cells stained by Phalloidin-Rhodamine) and representative TIRF images of myosin II (cells transfected with pEGFP-mRLC1) in control and Blebb. (100 μM) treated HeLa cells. Scale bar: 10 μm. (b) Representative SD<sub>(time)</sub> maps (non-FBR regions blocked in black) of whole cells for Blebb. (100 μM) (left) and Blebb. (100 μM) + Cyto D treated (right) cells. Scale bar: 10 μm. (c) The parameters of temporal fluctuations (SD<sub>(time)</sub>, Mean relative height and Exponent) in the different conditions (N = 10 each, n<sub>control</sub> = 165 FBRs, n<sub>Blebb</sub> = 195 FBRs and n<sub>Blebb+CD</sub> = 72 FBRs). Asterisks indicate a significant difference (\*\* p < 0.001, One-way ANOVA). See also **Tables S2 and S4**.

**Figure S13**

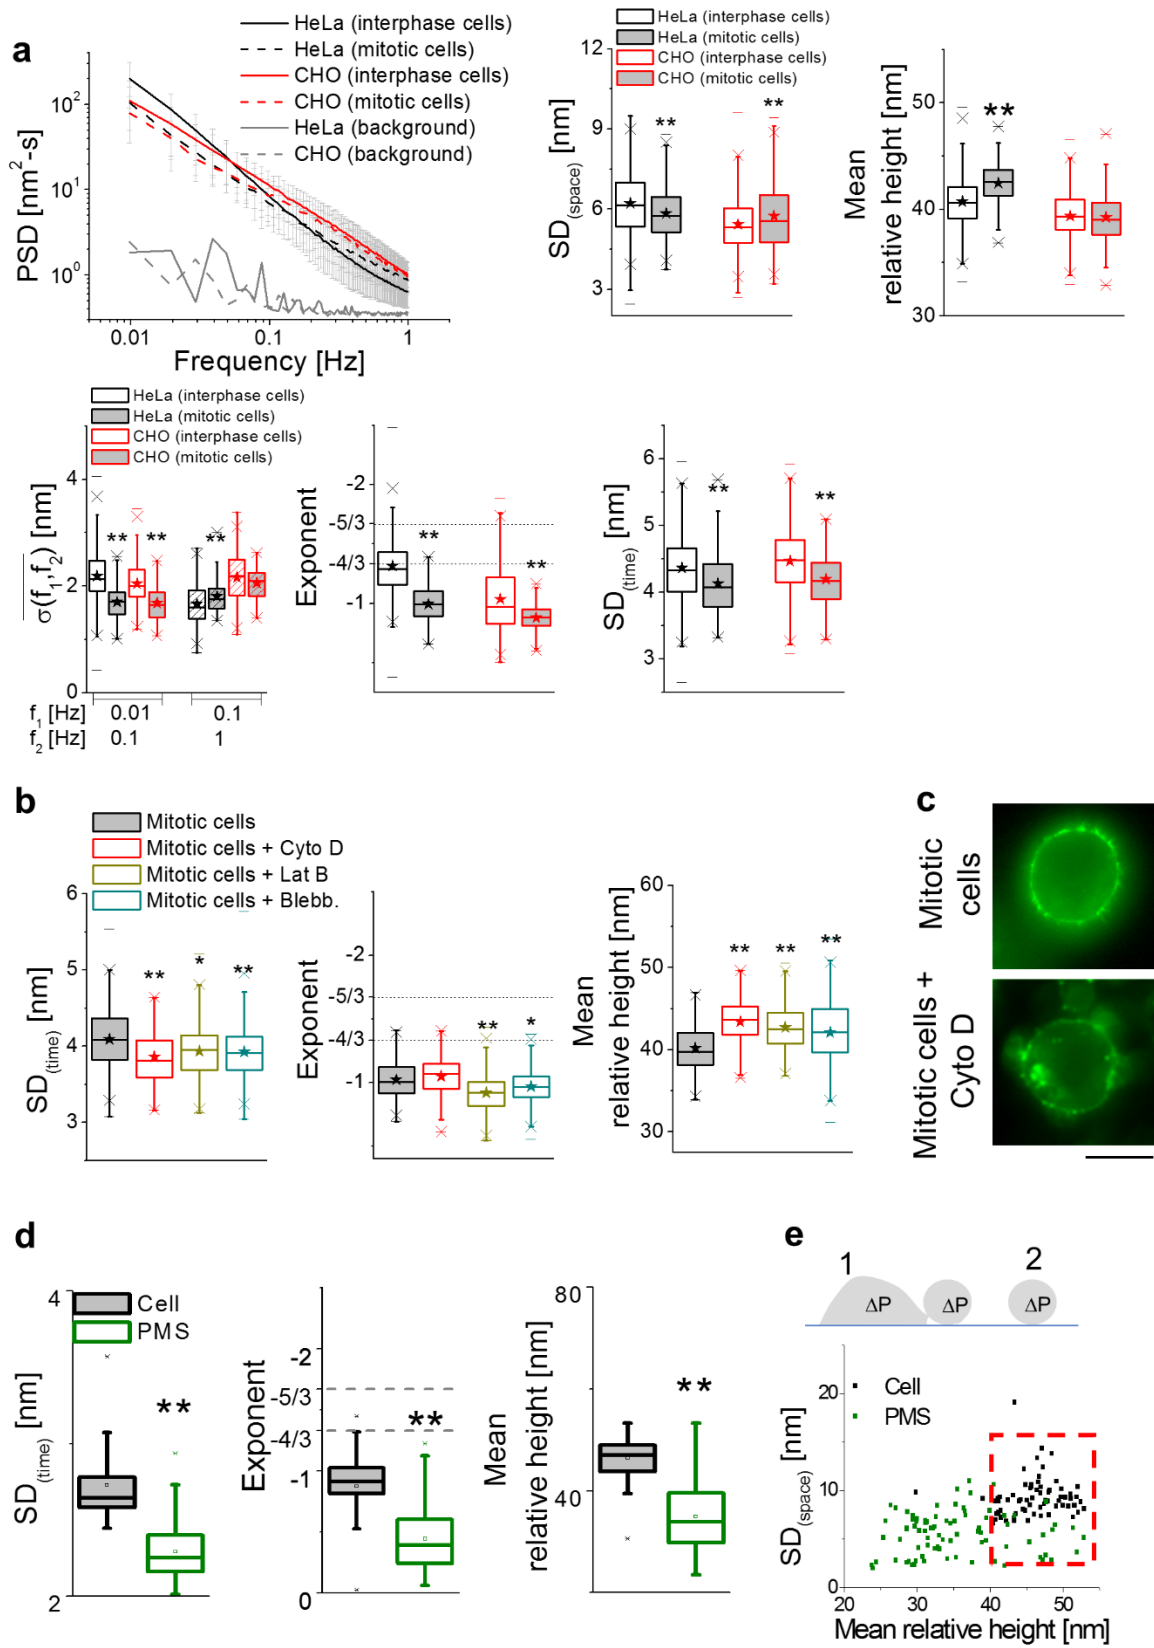

**Figure S13. Detailed parameters of membrane fluctuations during mitosis and in PMS.**

(a) The averaged PSD of interphase (solid lines) and mitotic (dotted lines) HeLa (black) and CHO (red) cells with their backgrounds. Parameters of spatial undulations and temporal fluctuations of the interphase and mitotic cells in the two cell lines ( $N=10$  cells each,  $n_{\text{interphase HeLa}} = 328$  FBRs,  $n_{\text{mitotic HeLa}} = 78$  FBRs,  $n_{\text{interphase CHO}} = 401$  FBRs and  $n_{\text{mitotic CHO}} = 60$  FBRs). (b) The values of  $SD_{(\text{time})}$ , Exponent and Mean relative height in mitotic cells, mitotic cells + Cyto D, mitotic cells + Lat B and mitotic cells + Blebb. ( $N = 15$  cells each,  $n_{\text{mitotic cells}} = 105$  FBRs,  $n_{\text{mitotic cells + Cyto D}} = 85$  FBRs,  $n_{\text{mitotic cells + Lat B}} = 182$  FBRs and  $n_{\text{mitotic cells + Blebb.}} = 215$  FBRs). (c) Representative images of mitotic cells stained with Alexa Flour 488 Phalloidin in the absence and presence of Cyto D. Scale bar:  $10 \mu\text{m}$ . (d) The parameters of temporal fluctuations ( $SD_{(\text{time})}$ , Exponent and Mean relative height) of cells and PMSs ( $N = 10$  each,  $n_{\text{cell}} = 70$  FBRs,  $n_{\text{PMS}} = 85$  FBRs). \*\* mark a significant difference ( $p < 0.001$ , One-way ANOVA). (e) Plot of  $SD_{(\text{space})}$  vs. mean relative height of cell derived PMS. Dotted region indicates cells and PMSs having the same relative height. Inset shows a schematic representation of a PMS pinched off but still adhered to the cell (1) and a cell free PMS (2) all having the same mean relative height and the same  $\Delta P$ . See also **Tables S2 and S4**.

**Figure S14**

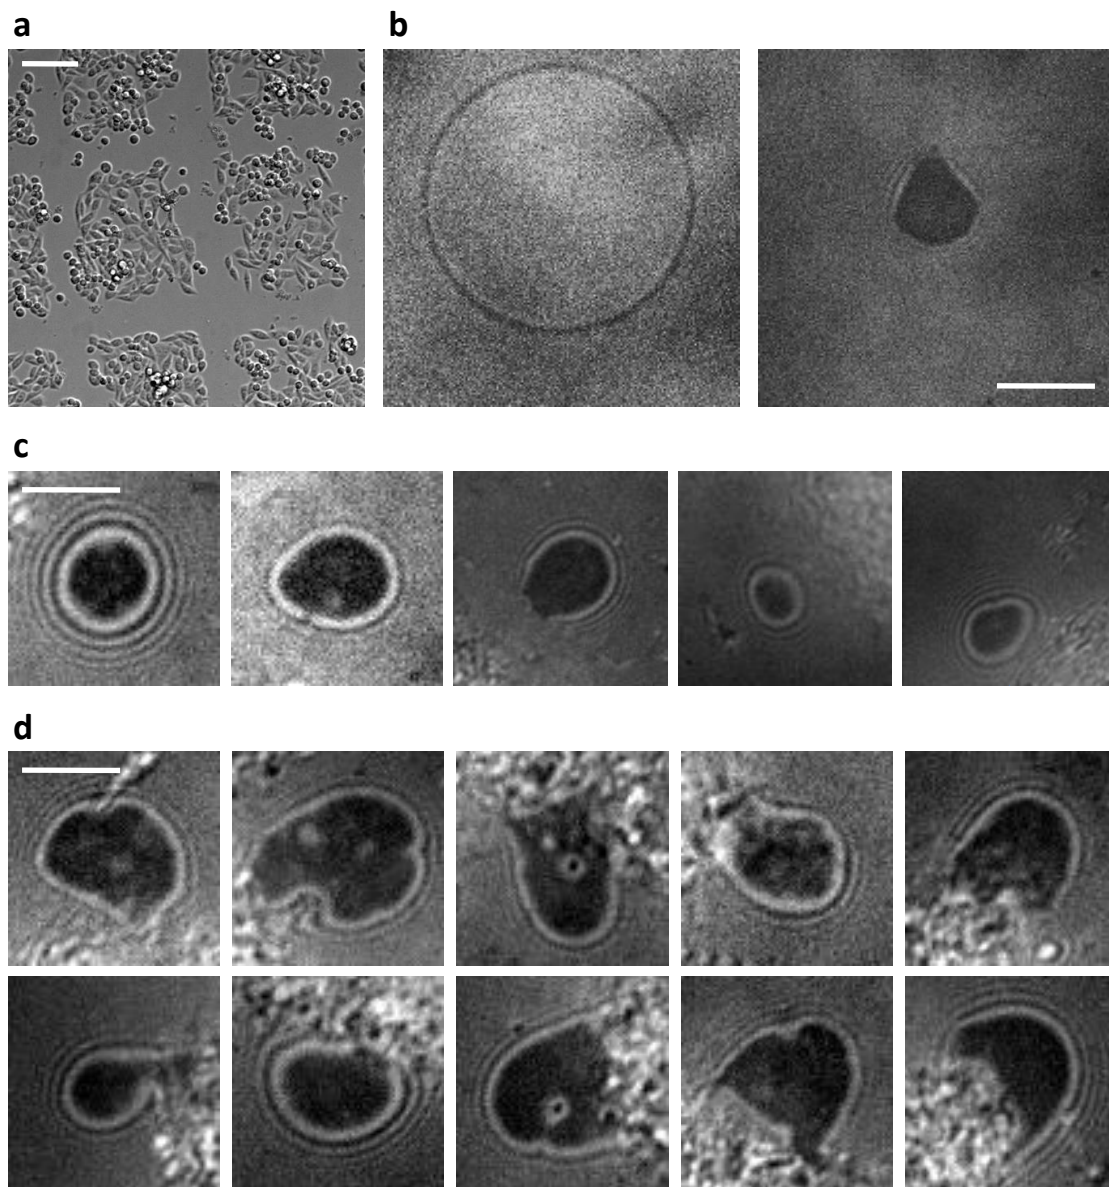

**Figure S14. Types of PMSs.**

(a) Micropatterned islands of CHO cells used for generating PMS. Scale bar: 30  $\mu\text{m}$ . (b) Representative images of a PMS in DIC (left) and IRM (right) modes. Scale bar: 5  $\mu\text{m}$ . (c) Representative IRM images of cell-free PMSs. Scale bar: 5  $\mu\text{m}$ . (d) Representative IRM images of cell-attached PMSs. Scale bar: 5  $\mu\text{m}$ .

**Figure S15**

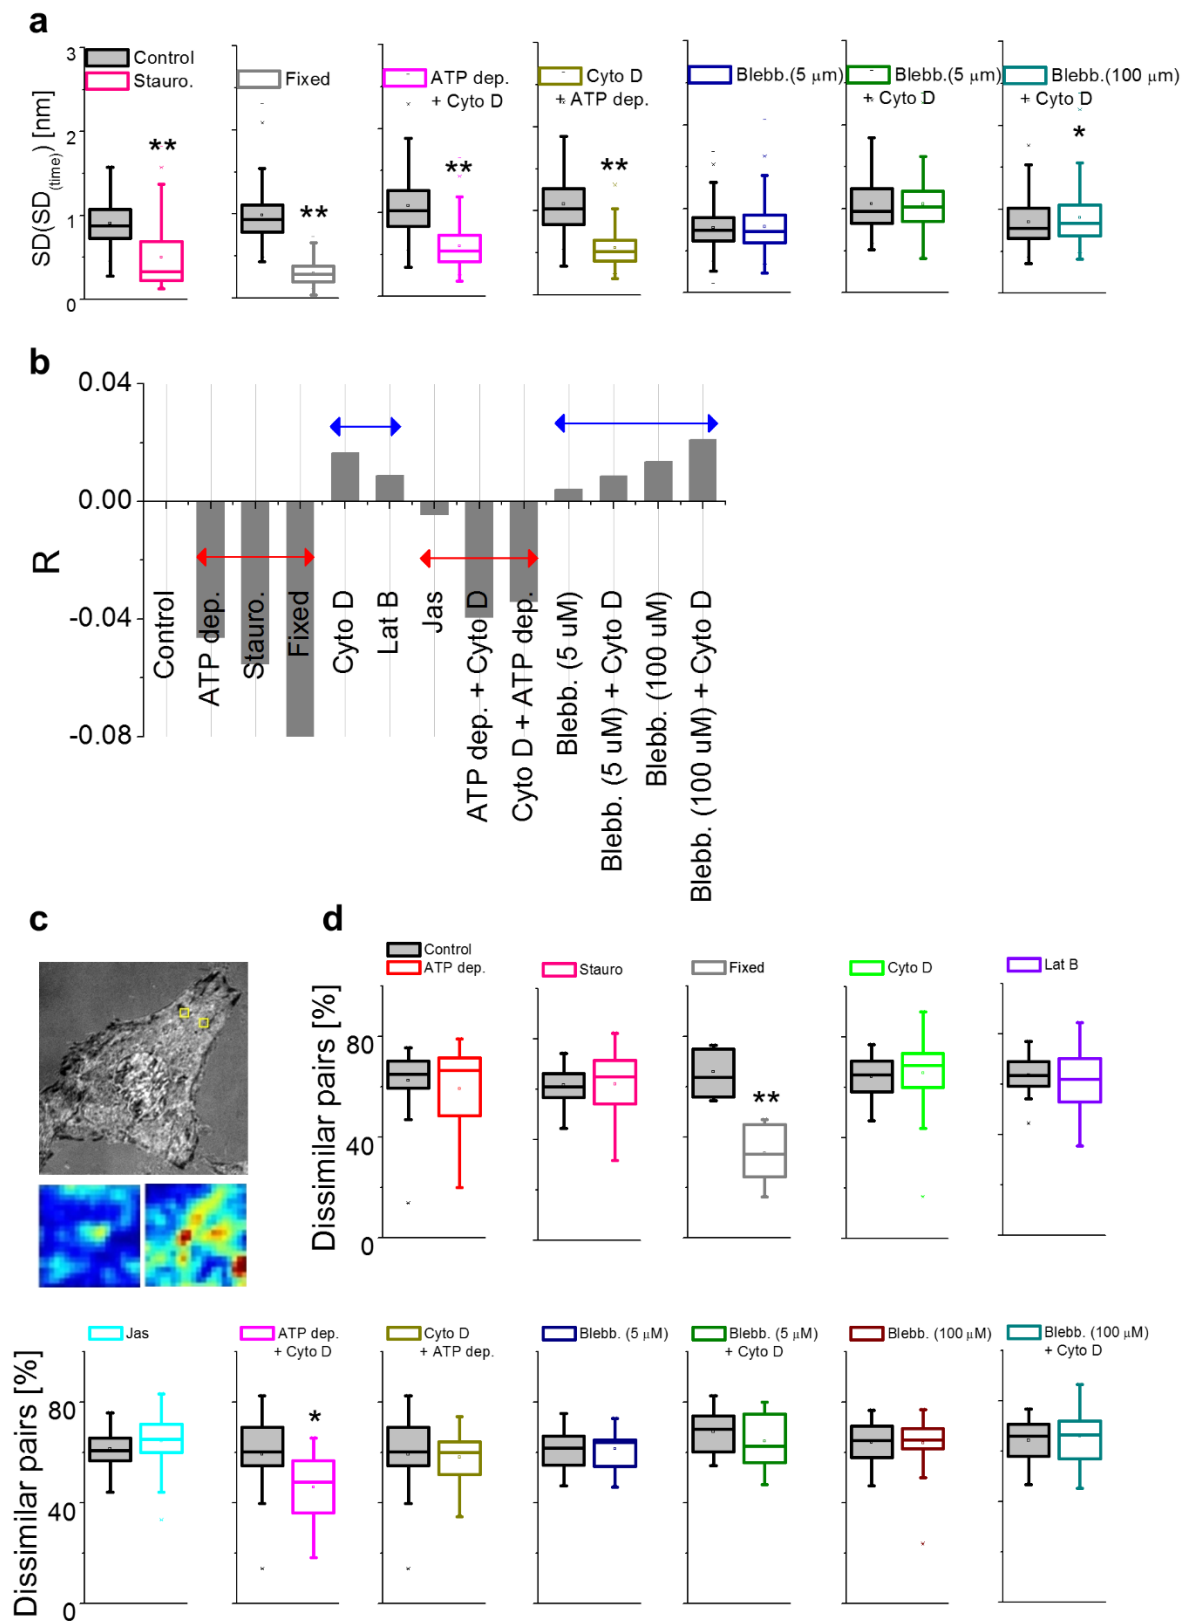

**Figure S15. A measure of short and long length scale heterogeneities in cells.**

(a)  $SD(SD_{(time)})$  for different conditions (N = 30 cells each). (b) Difference of ratio of  $SD(SD_{(time)})$  to  $Mean(SD_{(time)})$  of treated cells from that of control cell.

$$R = \left[ \frac{SD(SD_{(time)})}{Mean(SD_{(time)})} \right]_{treated} - \left[ \frac{SD(SD_{(time)})}{Mean(SD_{(time)})} \right]_{control} .$$

(c) Representative IRM image of a cell along with  $SD_{(time)}$  maps of the two marked FBRs with the p-value measured to be 0.0009 by hypothesis testing (one-way ANOVA) of the  $SD_{(time)}$  of the two. (d) Plots of the number of dissimilar pairs of FBRs (in %) between control and the treated sets. The parameters is

calculated as  $Dissimilar\ pairs = \frac{FBR\ pairs\ with\ SD_{(time)}\ having\ p < 0.001}{Total\ no.\ of\ FBR\ pairs}$ . \* p < 0.05, \*\* p <

0.001, one-way ANOVA. See also **Tables S2 and S4**.

## References

1. Limozin, L., and K. Sengupta. 2009. Quantitative reflection interference contrast microscopy (RICM) in soft matter and cell adhesion. *ChemPhysChem*. 10: 2752–2768.
2. Monzel, C., D. Schmidt, C. Kleusch, D. Kirchenbüchler, U. Seifert, A.-S. Smith, K. Sengupta, and R. Merkel. 2015. Measuring fast stochastic displacements of bio-membranes with dynamic optical displacement spectroscopy. *Nat. Commun*. 6: 8162.
3. Rodríguez-García, R., I.N. Ló Pez-Montero, M. Mell, G. Egea, N.S. Gov, and F. Monroy. 2015. Direct Cytoskeleton Forces Cause Membrane Softening in Red Blood Cells. *Biophys. J*. 108: 2794–2806.
4. Gov, N., A.G. Zilman, and S. Safran. 2003. Cytoskeleton confinement and tension of red blood cell membranes. *Phys. Rev. Lett*. 90: 228101.
5. Bicknese, S., N. Periasamy, S.B. Shohet, and A.S. Verkman. 1993. Cytoplasmic Viscosity Near the Cell Plasma Membrane: Measurement by Evanescent Field Frequency-Domain Microfluorimetry. *Biophys. J*. . 65: 1272–1282.
6. Kim, T., M.L. Gardel, and E. Munro. 2014. Determinants of Fluidlike Behavior and Effective Viscosity in Cross-Linked Actin Networks. *Biophys. J*. 106: 526–534.
7. Gov, N., and S.A. Safran. 2005. Red blood cell shape and fluctuations: Cytoskeleton confinement and ATP activity. *J. Biol. Phys*. 31: 453–464.
8. Betz, T., M. Lenz, J.-F. Joanny, and C.C. Sykes. 2009. ATP-dependent mechanics of red blood cells. *PNAS*. 106: 15320–15325.
9. Peukes, J., and T. Betz. 2014. Direct Measurement of the Cortical Tension during the Growth of Membrane Blebs. *Biophys. J*. 107: 1810–1820.
10. Lieber, A.D., S. Yehudai-Resheff, E.L. Barnhart, J.A. Theriot, and K. Keren. 2013. Membrane Tension in Rapidly Moving Cells Is Determined by Cytoskeletal Forces. *Curr. Biol*. 23: 1409–1417.
11. Fischer-Friedrich, E., A.A. Hyman, F. Jülicher, D.J. Müller, and J. Helenius. 2014. Quantification of surface tension and internal pressure generated by single mitotic cells. *Sci. Rep*. 6: 6213.
